# Supplementary material for: The Blinin Accumulation Promoted by CbMYB32 Involved in Conyza blinii Resistance to Nocturnal Low Temperature
Source: MDPI journal article supplement (doi:10.3390/ijms24087143), 2023-04-12
Supplement: s1 [file s1]

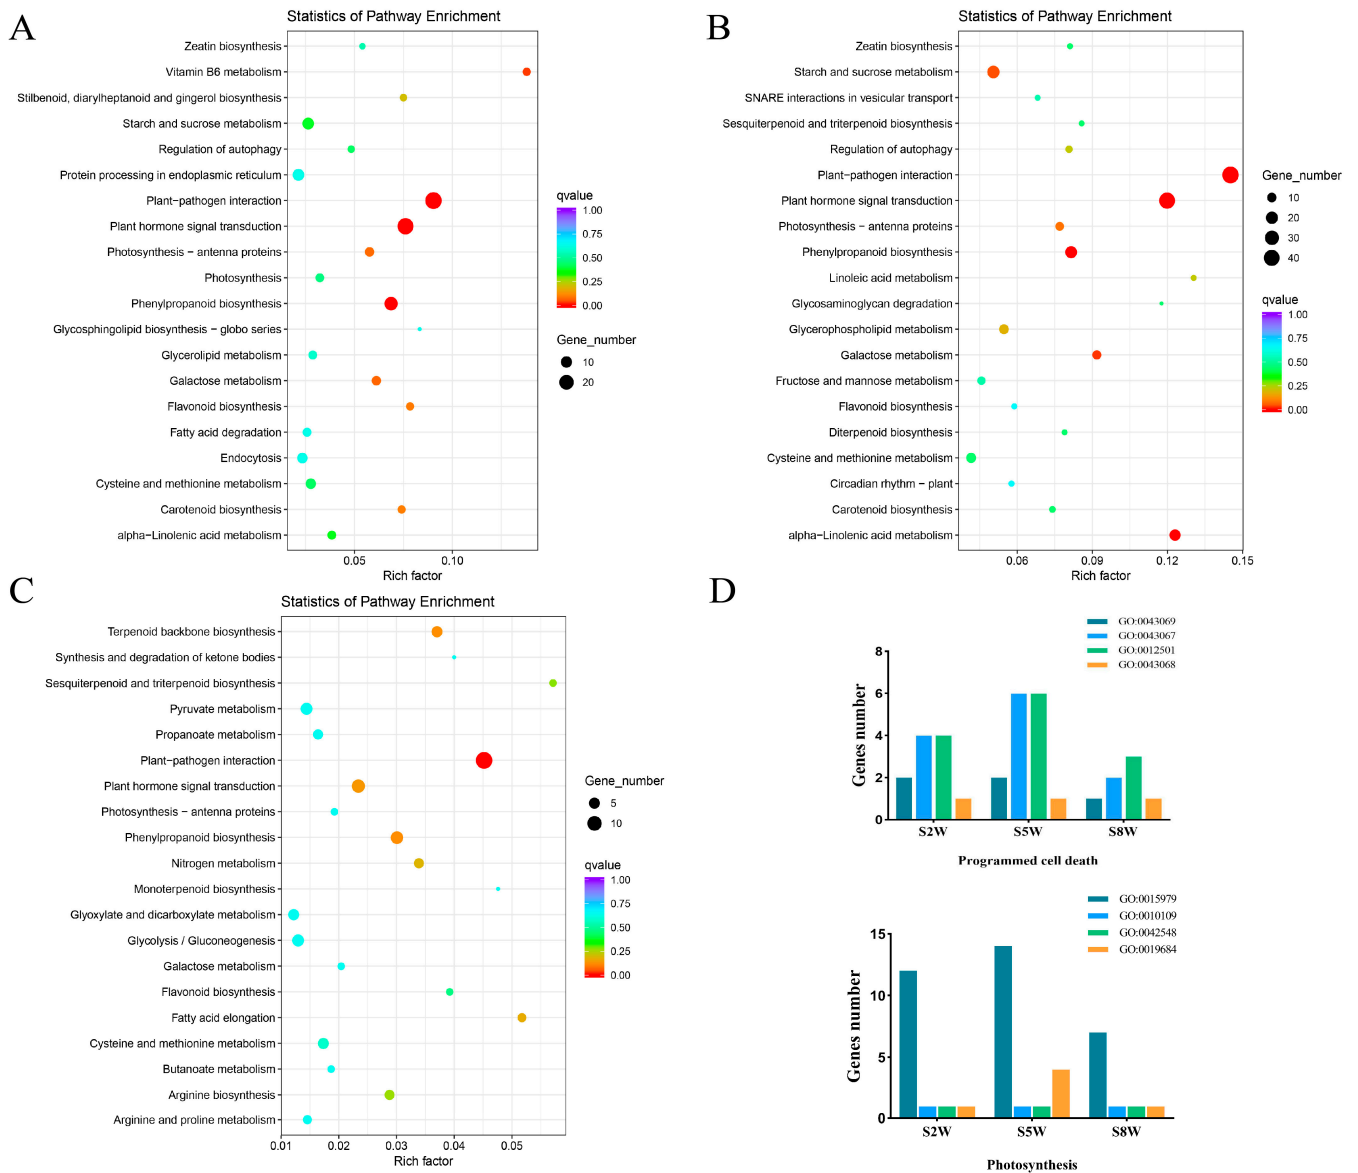

**Supplemental Figure S1.** KEGG enrichment analysis of up-regulated genes in S2W (A), S5W (B), S8W (C). The y-axis indicates the KEGG annotation information; the x-axis indicates the enrichment factor. Genes involved in programmed cell death (PCD) and photosynthesis annotated by GO (D).

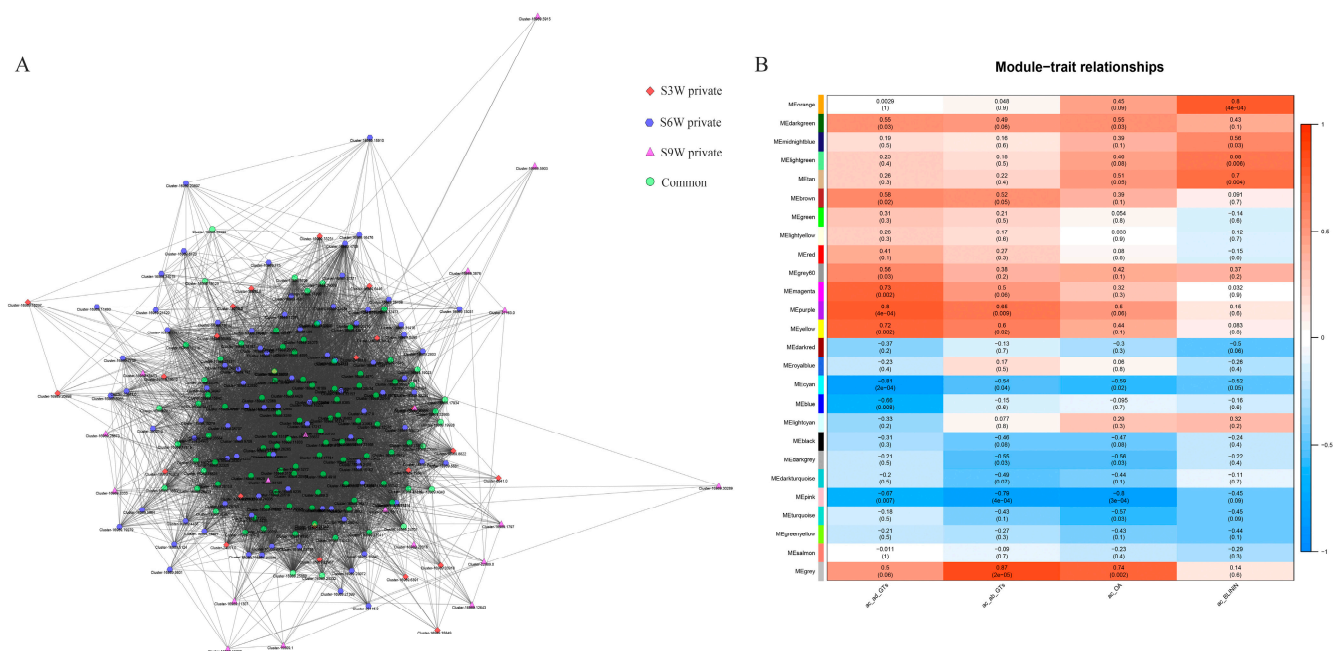

**Supplemental Figure S2. Gene-terpenoid network.** Co-Expression network of differential transcription factors for NLS in *C. blinii*. **(A)**. Correlation analysis between epigenetic characteristics and gene modules **(B)**. **ac\_ad\_GTs**: The accumulation of adaxial surface GTs; **ac\_ab\_GTs**: The accumulation of abaxial surface GTs; **ac\_saponin**: The accumulation of saponin; **ac\_blinin**: The accumulation of blinin.

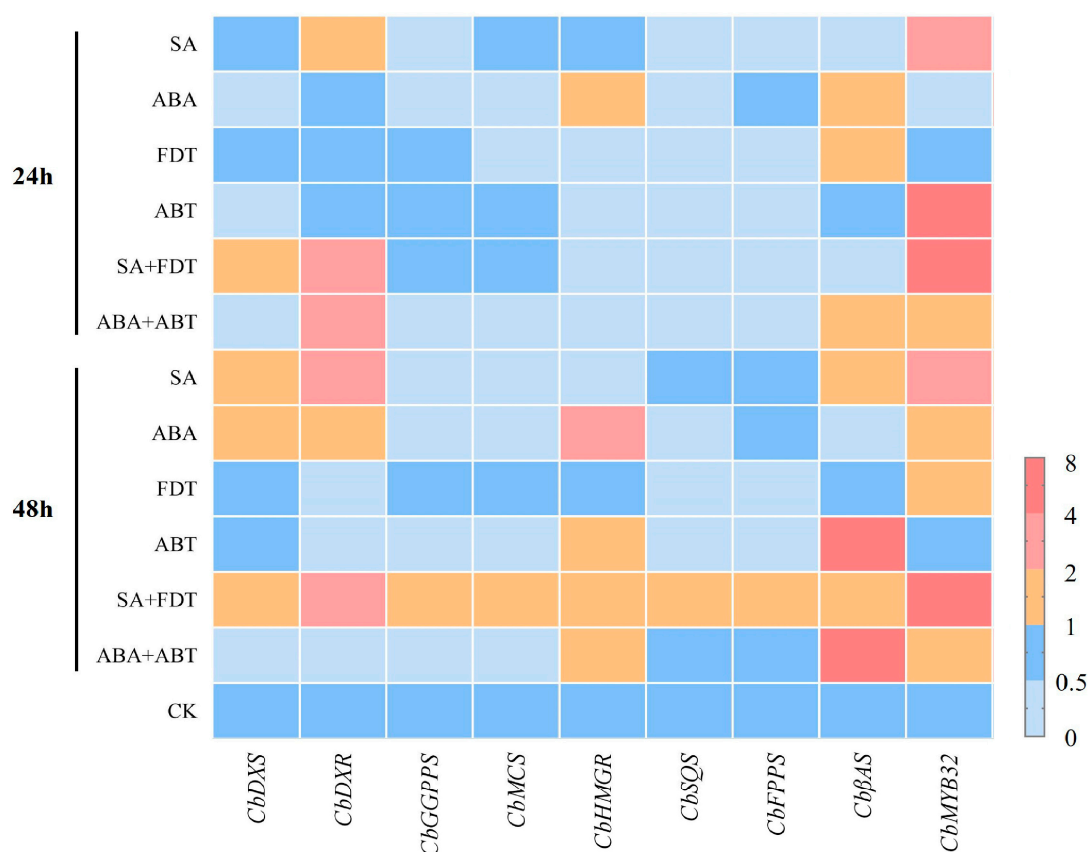

**Supplemental Figure S3.** Heat map of key enzymes gene expression in MEP pathways and *CbMYB32* after exogenous hormones treatment. The color gradient, ranging from blue, through yellow, to red represents values of genes expression. Fluridone (FDT) is an inhibitor of ABA, 1-Aminobenzotriazole (ABT) is an inhibitor of SA.

**Supplemental Table S1.** Prime sequence.

| Name                              | Sequence (F:5'-3', R:3'-5')                                                                                |
|-----------------------------------|------------------------------------------------------------------------------------------------------------|
| <i>CbMYB32</i> -pCambia1300       | F: gagaacacgggggacgagctcATGTAGTATTGCGGATTAGGGTTG<br>R: gcccttgctcaccatggtaccTTATAGTTGTTCTGAATTTATAAATTCCCA |
| <i>CbMYB32</i> -pGBKT7            | F: ccgggaattcggcctccatggATGTAGTATTGCGGATTAGGGTTG<br>R: tcagaggaggacctgcatatgTTATAGTTGTTCTGAATTTATAAATTCCCA |
| <i>CbMYB32</i> -pTRV <sub>2</sub> | F: ggatcttcagagatATGTAGTATTGCGGATTAGGGTTG<br>R: ctgccgttcgacgatCAAAGTCTCCTCTCTTTATATTTGGACG                |
| <i>CbPDS</i> -pTRV <sub>2</sub>   | F: ggatcttcagagatGGGGTTTGTTAAAGATTGAAGAGC<br>R: ctgccgttcgacgatCCCTCGACGGCTTCCTCC                          |
| <i>CbDXS</i> -pTRV <sub>2</sub>   | F: ggatcttcagagatTCTTTCCTACAAAGAGGTTATGATCAA<br>R: ctgccgttcgacgatATGTGCATGAGCTCGGACTCA                    |

**Supplemental Table S2.** Gene ID and GenBank of the reported TF sequences regulating terpenoids.

| Gene ID        | GenBank        | Gene ID        | GenBank    | Gene ID        | GenBank    |
|----------------|----------------|----------------|------------|----------------|------------|
| <i>SmMYB9</i>  | AGN52143.1     | <i>CrWRKY1</i> | ADT82685.1 | <i>BpbHLH9</i> | A0A1X9RU20 |
| <i>SmMYB36</i> | AGN52170.1     | <i>AaORA</i>   | AGB07586.1 | <i>AaNAC1</i>  | AQU15092.1 |
| <i>SmMYB1</i>  | AGN52135.1     | <i>AaERF1</i>  | AEQ93554.1 | <i>CsERF1</i>  | AAV66332.1 |
| <i>BpMYB61</i> | KT344120       | <i>AaERF2</i>  | AEQ93555.1 | <i>SINAC4</i>  | AGH20612.1 |
| <i>BpMYB21</i> | XP_018851905.1 | <i>AaHY5</i>   | JAT51023.1 | <i>AaHDR</i>   | ARA24921.1 |
| <i>AaEIN3</i>  | PWA84782.1     | <i>AabHLH1</i> | A0A3S9XA60 | <i>AcNAC3</i>  | KF319052.1 |
